# Supplementary material
Source: publisher site journal article supplement (https://www.dovepress.com/article/441784)
Supplement: Supplementary file 1 [file get_supplementary_file.php]

**Supplemental Table 1** Differences in cumulative live-birth rate between IVF/ICSI and PGT-A

| Characteristics | <38 years old | | | |  | ≥38 years old | | | |
| --- | --- | --- | --- | --- | --- | --- | --- | --- | --- |
| Crude OR (95%CI) | *P* value | Adjusted OR (95%CI) | *P* value |  | Crude OR (95%CI) | *P* value | Adjusted OR (95%CI) | *P* value |
| IVF/ICSI group | Ref | - | Ref | - |  | Ref | - | Ref | - |
| PGT-A group | 1.38 (0.96-1.99) | 0.081 | 1.25 (0.84-1.84) | 0.270 |  | 1.49 (0.60-3.70) | 0.386 | 1.09 (0.41-2.92) | 0.866 |
| Age-yr | 0.91 (0.86-0.97) | 0.002 | 0.91 (0.86-0.97) | 0.002 |  | 0.67 (0.52-0.86) | 0.002 | 0.61 (0.47-0.81) | 0.001 |
| BMI | 0.98 (0.92-1.03) | 0.374 | 0.98 (0.93-1.04) | 0.487 |  | 1.03 (0.92-1.17) | 0.597 | 1.04 (0.92-1.18) | 0.497 |
| Anti-Mullerian hormone-ng/mL | 1.11 (1.03-1.19) | 0.003 | 1.09 (1.02-1.17) | 0.017 |  | 1.19 (1.02-1.39) | 0.026 | 1.32 (1.10-1.57) | 0.003 |
| Previous embryo transfers-no. | 0.97 (0.88-1.07) | 0.537 | 1.00 (0.91-1.11) | 0.948 |  | 1.06 (0.87-1.30) | 0.568 | 1.12 (0.90-1.38) | 0.314 |
| Endometrial thickness-mm | 0.77 (0.37-1.58) | 0.475 | 0.73 (0.35-1.53) | 0.399 |  | 1.54 (0.32-7.52) | 0.594 | 0.95 (0.18-5.19) | 0.955 |

**Abbreviations:** OR, odds ratio; CI, confidence internal.

**Supplemental Table 2** Differences in cumulative good birth outcome between IVF/ICSI and PGT-A

| Characteristics | <38 years old | | | |  | ≥38 years old | | | |
| --- | --- | --- | --- | --- | --- | --- | --- | --- | --- |
| Crude OR (95%CI) | *P* value | Adjusted OR (95%CI) | *P* value |  | Crude OR (95%CI) | *P* value | Adjusted OR (95%CI) | *P* value |
| IVF/ICSI group | Ref | - | Ref | - |  | Ref | - | Ref | - |
| PGT-A group | 1.61 (1.11-2.34) | 0.012 | 1.43 (0.96-2.13) | 0.083 |  | 1.45 (0.55-3.83) | 0.449 | 0.97 (0.34-2.77) | 0.951 |
| Age-yr | 0.93 (0.88-0.99) | 0.018 | 0.94 (0.88-0.99) | 0.031 |  | 0.68 (0.52-0.89) | 0.005 | 0.62 (0.46-0.83) | 0.002 |
| BMI | 0.96 (0.91-1.01) | 0.137 | 0.96 (0.91-1.02) | 0.184 |  | 1.01 (0.88-1.14) | 0.941 | 1.01 (0.89-1.15) | 0.904 |
| Anti-Mullerian hormone-ng/ml | 1.11 (1.04-1.19) | 0.001 | 1.09 (1.02-1.17) | 0.012 |  | 1.21 (1.03-1.42) | 0.019 | 1.34 (1.11-1.61) | 0.002 |
| Previous embryo transfers-no. | 0.94 (0.85-1.04) | 0.208 | 0.96 (0.87-1.07) | 0.461 |  | 1.07 (0.87-1.33) | 0.509 | 1.15 (0.92-1.43) | 0.238 |
| Endometrial thickness-mm | 0.87 (0.42-1.81) | 0.716 | 0.82 (0.39-1.73) | 0.596 |  | 2.56 (0.47-14.06) | 0.279 | 1.77 (0.29-10.86) | 0.539 |
